# Supplementary material for: Cyclopentadienyl benzamidinato chromium complexes as models for alkyl halide activation by chromium reagentsElectronic supplementary information (ESI) available: experimental and computational details. See http://www.rsc.org/suppdata/cc/b2/b207710h/
Source: Royal Society of Chemistry journal article supplement (doi:10.1039/b207710h), 2002-11-04
Supplement: b207710h.doc [file b207710h.doc]

Supplementary data

Experimental details

*General considerations*

All compounds are air sensitive, and were synthesized and stored under N2 using standard Schlenk and glovebox techniques. THF, Et2O and pentane were dried using Grubbs/Dow columns.**[[1]](#endnote-2)** C6D6 and (Me3Si)2O were distilled from Na/benzophenone, freeze/pump/thaw degassed and stored in a glovebox. Anhydrous reagents (allylMgCl, benzylMgBr, tetramethylethylenediamine (tmeda), HCl in dioxane, PhCN, LiN(SiMe3)2) were purchased from Aldrich and used as received. Celite (Aldrich) was dried overnight in a 110 C oven before being evacuated and stored in a glovebox. CpCrCl2(THF) was prepared by reacting Cp2Cr with anhydrous HCl in THF.**[[2]](#endnote-3)** The amidinato ligands [(tmeda)Li][(Me3SiN)2CPh] and [(tmeda)Li][(Me3SiN)2CC6H4CF3] were prepared in pentane from LiN(SiMe3)2 and PhCN (or 4-CF3C6H4CN), followed by addition of tmeda.**[[3]](#endnote-4)** 1H and 19F NMR were obtained in C6D6 solution on a Bruker Avance 300 spectrometer. Elemental analyses were performed by Canadian Microanalytical Service, Delta, BC, Canada.

*Synthesis of CpCr[(Me3SiN)2CPh]Cl* 1a

A solution of [(tmeda)Li][(Me3SiN)2CPh] (1601 mg, 4.13 mmol) in THF was added dropwise at room temperature to a stirred blue suspension of CpCrCl2(THF) (1100 mg, 4.23 mmol) in ~100 mL of THF. The resulting aqua-coloured solution was stirred overnight, after which time the solvent was removed *in vacuo*. The residue was extracted in ~40 mL Et2O and filtered through Celite supported on a sintered glass frit. The filtrate was reduced in volume to ~25 mL and filtered through Celite a second time. Recrystallization of the product by slow evaporation of the Et2O solution provided blue-black crystals of 1a in several crops (1265 mg, 3.04 mmol, 74% yield).

Anal. C18H28ClCrN2Si2 calc C 51.96% H 6.78% N 6.73% found C 51.85% H 6.66% N 6.63%

*Synthesis of CpCr[(Me3SiN)2CC6H4CF3]Cl* 1b

A solution of [(tmeda)Li][(Me3SiN)2CC6H4CF3] (1394 mg, 3.07 mmol) in ~5 mL THF was added dropwise at room temperature to a cold, stirred blue suspension of CpCrCl2(THF) (638 mg, 2.45 mmol) in ~20 mL of THF. The resulting blue-green solution was stirred overnight, after which time the solvent was removed *in vacuo*. The residue was extracted with a 1:1 mixture of Et2O:pentane and filtered through Celite supported on a sintered glass frit. Cooling the solution at –30 C for 6 h produced black crystals of 1b (705 mg, 1.46 mmol, 59% yield).

Anal. C19H27ClCrF3N2Si2 calc C 47.15% H 5.62% N 5.79% found C 47.22% H 5.42% N 5.78%

*Synthesis of CpCr[(Me3SiN)2CPh](CH2Ph)* 2a

A solution of PhCH2MgCl (0.45 mL, 1.0 M, 0.45 mmol) in Et2O was added dropwise to a cold, stirred blue-aqua solution of 1a (182 mg, 0.437 mmol) in ~10 mL of THF. The resulting solution turned purple within 80 min, and was stirred for 3 h, after which time the solvent was removed *in vacuo*. The residue was extracted in a minimum amount of pentane and filtered through Celite. The pentane was removed *in vacuo* and the residue was extracted with a minimal amount of (Me3Si)2O. Cooling the solution at –30 C produced purple-black crystals of 2a (130 mg, 0.276 mmol, 63% yield).

Anal. C25H35CrN2Si2 calc C 63.65% H 7.48% N 5.94% found C 63.13% H 7.28% N 5.88%

*Synthesis of CpCr[(Me3SiN)2CC6H4CF3](CH2Ph)* 2b

A solution of PhCH2MgCl (0.30 mL, 1.0 M, 0.30 mmol) in Et2O was added dropwise to a cold, stirred blue solution of 1b (146 mg, 0.302 mmol) in ~20 mL of THF. The resulting solution turned violet within 5 min, and was stirred for 2 h, after which time the solvent was removed *in vacuo*. The residue was extracted in a minimal amount of (Me3Si)2O and filtered through Celite. Cooling the solution at –30 C produced purple-black crystals of 2b (78 mg, 0.145 mmol, 48% yield).

Anal. C26H34CrF3N2Si2 calc C 57.86% H 6.35% N 5.19% found C 54.96% H 6.05% N 4.87%

*Synthesis of CpCr[(Me3SiN)2CPh]* 3a

A solution of CH2=CHCH2MgBr (0.60 mL, 1.0 M, 0.60 mmol) in Et2O was diluted with ~5 mL of THF and was added dropwise to a stirred blue-aqua solution of 1a (250 mg, 0.601 mmol) in ~25 mL of THF. The resulting solution initially turned purple, but by the end of the addition was red-purple. The solution was stirred for 3 h, after which time the solvent was removed *in vacuo*. The residue was extracted with 10 mL of pentane and filtered through Celite. The resulting red-brown pentane solution was used *in situ* for further reactions of 3a. Attempts to isolate 3a were hindered by the high pentane solubility and air-sensitivity of the product, typically resulting in low (~10%) yields of red-brown crystals.

Anal. C18H28CrN2Si2 calc C 56.80% H 7.42% N 7.36% found C 38.95% H 5.44% N 5.45%

*Synthesis of CpCr[(Me3SiN)2CC6H4CF3]* 3b

A solution of CH2=CHCH2MgBr (0.10 mL, 1.0 M, 0.10 mmol) in Et2O was diluted with ~3 mL of THF and was added dropwise to a stirred blue-aqua solution of 1b (47 mg, 0.097 mmol) in ~12 mL of THF. The resulting solution initially turned purple, but by the end of the addition was red-purple. The solution was stirred for 3 h, after which time the solvent was removed *in vacuo* from the red-orange solution. The residue was extracted with ~9 mL of pentane and filtered through Celite. The resulting red-brown pentane solution was used *in situ* for further reactions of 3b. For 19F NMR experiments, the pentane solvent was removed *in vacuo* and the residue was dissolved in C6D6. Attempts to isolate 3b were hindered by the high pentane solubility and air-sensitivity of the product.

Computational Methods:

The density functional theoretical calculations were performed using Gaussian 98 for Windows,[[4]](#endnote-5) using the three-parameter form of the Becke, Lee, Tang and Parr functional (B3LYP)[[5]](#endnote-6) and LANL2DZ basis set.[[6]](#endnote-7) All structures were fully optimized without symmetry constraints, and analytical frequency calculations were conducted to check that there were no imaginary frequencies. Zero point energies and thermodynamic functions were calculated at 298.15 K and 1 atm. The energies reported for the open-shell (doublet, triplet, quartet, and quintet) systems correspond to unrestricted B3LYP calculations. The mean value of the first-order wave function, which is not an exact eigenstate for *S*2 for unrestricted calculations, was considered suitable for the unambiguous identification of the spin state. Spin contamination was carefully monitored, and the values of *S*(*S*+1) before and after spin annihilation are listed below for each calculation.

Cartesian coordinates (Å) and energies (Hartrees) for calculated complexes (1 Hartree = 627.5095 kilocalories/mole or 27.2116 electron volts)

**Quartet CpCr[(HN)2CH]Cl**

C -1.134925 1.794331 -0.725146

C -1.139082 1.800180 0.707430

C 0.225288 1.881671 1.156666

C 1.066481 1.947451 -0.003187

C 0.232468 1.874991 -1.166849

Cr -0.031645 -0.134094 -0.000252

N -1.052880 -1.476022 -1.123593

C -1.441820 -2.145463 -0.027338

N -1.099124 -1.473246 1.082597

Cl 1.998917 -1.259846 0.044388

H -2.005679 1.719137 -1.362071

H -2.013713 1.729194 1.339569

H 0.559660 1.904827 2.184916

H 2.146562 1.983670 0.000296

H 0.572537 1.891464 -2.193397

H -1.941721 -3.117887 -0.036643

H -1.120733 -1.876868 -2.051053

H -1.205455 -1.871986 2.007356

Energy = -444.242980284

*S*(*S*+1) before spin annihilation 3.8148, after 3.7513

Sum of electronic and zero-point Energies= -444.109351

Sum of electronic and thermal Energies= -444.098617

Sum of electronic and thermal Enthalpies= -444.097673

Sum of electronic and thermal Free Energies= -444.149500

**Quartet CpCr[(HN)2CH](CH2C6H5)**

C -2.491065 -0.658707 1.201461

C -1.792818 -0.866910 -0.017481

C -2.496323 -0.608391 -1.223580

C -3.826087 -0.152211 -1.213580

C -4.498718 0.057873 0.007689

C -3.820915 -0.203245 1.216164

C -0.381937 -1.342907 -0.030089

Cr 1.129162 0.128593 0.001406

N 0.154336 1.516131 1.127481

C -0.325158 2.117325 0.026455

N 0.164639 1.551858 -1.088721

C 3.426940 0.499588 -0.680468

C 3.414618 0.451495 0.743337

C 2.947933 -0.851701 1.143762

C 2.710923 -1.618040 -0.045349

C 2.968799 -0.773924 -1.175498

H 3.697475 1.354330 -1.286597

H 3.674252 1.263291 1.410247

H 2.851526 -1.208568 2.161037

H 2.367042 -2.643149 -0.082861

H 2.889052 -1.061064 -2.216140

H -0.140130 -1.948648 0.855160

H -1.043513 2.942260 0.036840

H -0.150867 1.842483 -2.005980

H -0.176440 1.771770 2.049703

H -1.990964 -0.774753 -2.173965

H -4.341494 0.030631 -2.154869

H -5.529558 0.404749 0.017242

H -4.332551 -0.060876 2.166448

H -1.981756 -0.864810 2.141910

H -0.141949 -1.911260 -0.940177

Energy = -700.150737572

*S*(*S*+1) before spin annihilation 3.8484, after 3.7521

Sum of electronic and zero-point Energies= -699.900390

Sum of electronic and thermal Energies= -699.884649

Sum of electronic and thermal Enthalpies= -699.883705

Sum of electronic and thermal Free Energies= -699.948239

**Quintet CpCr[(HN)2CH]**

C -1.775777 -0.552168 1.095053

C -1.742481 -1.200926 -0.193331

C -1.783230 -0.187228 -1.210167

C -1.751686 1.084047 -0.554924

C -1.764952 0.856381 0.873300

Cr 0.313705 -0.001154 -0.005364

N 2.045183 1.116921 0.000537

C 2.798118 0.001644 0.004658

N 2.048764 -1.115650 0.001010

H 2.488090 -2.028584 0.003797

H 3.893981 0.005297 0.012426

H 2.482161 2.030977 0.003715

H -1.764047 -2.270558 -0.362711

H -1.808734 -0.356311 -2.279450

H -1.773619 2.052286 -1.039787

H -1.785558 1.625146 1.635868

H -1.798780 -1.049943 2.056522

Energy = -429.247646599

*S*(*S*+1) before spin annihilation 6.0267, after 6.0001

Sum of electronic and zero-point Energies= -429.116320

Sum of electronic and thermal Energies= -429.107946

Sum of electronic and thermal Enthalpies= -429.107002

Sum of electronic and thermal Free Energies= -429.151473

The geometry listed for CpCr[(HN)2CH] above was found to have *one imaginary frequency* at 16.3639*i* cm–1. The corresponding normal mode for this frequency involved rotation of the C5H5 ligand relative to the planar Cr[(HN)2CH] fragment, about an axis perpendicular to the Cp plane. The structure was reoptimized three times starting with different relative orientations of the Cp ligand. These attempts converged to different rotational conformers of the CpCr[(HN)2CH], each only slightly (less than 0.01 kcal/mol) higher in energy than the geometry shown. Each of these conformers also displayed a single imaginary frequency at between 18*i* and 23*i* cm–1, all corresponding to rotation of the Cp ligand. Note that the optimized geometry of the silyl substituted model compound, CpCr[(H3SiN)2CH], did not possess any imaginary frequencies.

**Quartet CpCr[(HN)2CH](1-CH2CHCH2)**

C -1.926044 -1.616931 -0.238870

C -0.805415 -1.863070 -1.112705

C 0.363069 -2.021740 -0.296309

C -0.019551 -1.811095 1.068658

C -1.442877 -1.583458 1.101001

Cr -0.326680 0.205719 -0.096690

C 1.530281 0.844091 -0.838289

C 2.609198 0.660134 0.163100

C 3.616821 -0.252675 0.123166

N -1.403924 1.746034 -0.913021

C -1.280296 2.472475 0.209142

N -0.586052 1.808511 1.147965

H -2.034108 -1.392530 1.987274

H -2.948303 -1.448833 -0.552366

H -0.849275 -1.965395 -2.189445

H 1.368376 -2.212594 -0.643889

H 0.641113 -1.857762 1.924228

H 1.312642 1.900514 -1.036250

H 1.713671 0.308041 -1.779769

H 2.565910 1.330729 1.027107

H 3.735651 -0.936021 -0.717401

H 4.355739 -0.322348 0.918380

H -1.686630 3.481093 0.340327

H -0.391850 2.221125 2.052330

H -1.883902 2.108517 -1.727940

Energy = -546.518624042

*S*(*S*+1) before spin annihilation 3.8525, after 3.7523

Sum of electronic and zero-point Energies= -546.316651

Sum of electronic and thermal Energies= -546.303179

Sum of electronic and thermal Enthalpies= -546.302235

Sum of electronic and thermal Free Energies= -546.358527

**Doublet CpCr[(HN)2CH](3-CH2CHCH2)**

C 1.907978 0.037524 -1.164770

C 2.085172 0.860386 -0.003287

C 1.909347 0.043484 1.162741

C 1.615475 -1.286831 0.720102

C 1.614592 -1.290476 -0.714995

Cr -0.114965 0.081947 -0.000053

C -0.800023 1.775965 1.216490

C -1.534668 1.664435 0.000096

C -0.799597 1.776302 -1.216049

C -1.915616 -1.697426 -0.000081

N -1.427142 -1.101030 -1.094276

N -1.426451 -1.101661 1.094167

H 1.414100 -2.138071 1.355575

H 1.412373 -2.144970 -1.345854

H 1.984962 0.361507 -2.193790

H 2.311239 1.919094 -0.006116

H 1.987704 0.372677 2.189994

H -1.270134 1.514102 -2.158876

H 0.039531 2.467578 -1.280559

H -2.534918 1.245460 -0.000131

H 0.039176 2.467181 1.281315

H -1.270729 1.513626 2.159218

H -2.592495 -2.560011 -0.000102

H -1.640971 -1.433436 2.027987

H -1.641506 -1.432795 -2.028129

Energy = -546.485332305

*S*(*S*+1) before spin annihilation 0.7911, after 0.7512

Sum of electronic and zero-point Energies= -546.281807

Sum of electronic and thermal Energies= -546.269401

Sum of electronic and thermal Enthalpies= -546.268456

Sum of electronic and thermal Free Energies= -546.320183

**Quartet CpCr[(H3SiN)2CH]Cl**

C -0.883644 2.320540 -1.011649

C -0.882781 2.317131 0.427551

C 0.480589 2.315275 0.870028

C 1.326529 2.314315 -0.293714

C 0.480721 2.334673 -1.452299

Cr 0.099651 0.318848 -0.290104

Cl 0.733262 -0.950412 -2.123051

N -1.331982 -0.938328 0.417176

C -0.419361 -1.522561 1.208683

N 0.788378 -0.940748 1.147667

H -1.757467 2.308151 1.064309

H 0.814146 2.302264 1.899208

H 2.408428 2.318924 -0.297471

H 0.814820 2.308008 -2.480502

H -1.756787 2.330860 -1.650478

H -0.635477 -2.397526 1.833378

Si -2.997890 -1.385723 0.049727

Si 2.326035 -1.393609 1.883348

H 2.103741 -2.560518 2.780987

H 3.323138 -1.738377 0.843561

H 2.845014 -0.254675 2.683491

H -3.374594 -2.561613 0.881564

H -3.897749 -0.249391 0.375010

H -3.145423 -1.713532 -1.387233

Energy = -454.424243554

*S*(*S*+1) before spin annihilation 3.8148, after 3.7513

Sum of electronic and zero-point Energies= -454.260701

Sum of electronic and thermal Energies= -454.245015

Sum of electronic and thermal Enthalpies= -454.244071

Sum of electronic and thermal Free Energies= -454.306861

**Quintet CpCr[(H3SiN)2CH]**

C -0.989548 2.494537 -0.678866

C -0.987894 2.490936 0.766735

C 0.368951 2.489325 1.203756

C 1.212132 2.485652 0.030647

C 0.369892 2.541362 -1.128828

Cr 0.002832 0.423893 -0.005035

N 1.093706 -1.314884 0.287615

C 0.002388 -2.035923 -0.025627

N -1.088239 -1.309449 -0.328606

H -1.865447 2.504673 1.401285

H 0.711838 2.499684 2.230989

H 2.295038 2.515975 0.031211

H 0.701841 2.589541 -2.158382

H -1.869815 2.530479 -1.309252

H 0.001596 -3.135280 -0.032465

Si -2.699557 -1.850787 -0.785485

Si 2.703370 -1.864187 0.740775

H 2.747430 -3.354716 0.753109

H 3.713563 -1.358231 -0.223915

H 3.060436 -1.357577 2.090861

H -2.751655 -3.341081 -0.795431

H -3.708323 -1.336785 0.176262

H -3.051643 -1.345485 -2.137469

Energy = -439.426653039

*S*(*S*+1) before spin annihilation 6.0289, after 6.0001

Sum of electronic and zero-point Energies= -439.265544

Sum of electronic and thermal Energies= -439.251345

Sum of electronic and thermal Enthalpies= -439.250401

Sum of electronic and thermal Free Energies= -439.310999

**Singlet C6H5CH2Cl**

C -0.012817 0.000043 0.469005

C 0.670958 1.217949 0.254069

C 2.012169 1.219031 -0.167654

C 2.685984 -0.000052 -0.379646

C 2.012110 -1.219078 -0.167598

C 0.670896 -1.217899 0.254125

H 0.150348 2.160597 0.411054

H 2.529137 2.161630 -0.329979

H 3.723268 -0.000068 -0.705974

H 2.529013 -2.161722 -0.329867

H 0.150245 -2.160518 0.411153

C -1.438873 0.000066 0.925611

H -1.716163 -0.897947 1.477940

H -1.716203 0.898134 1.477825

Cl -2.661895 -0.000027 -0.561155

Energy = -285.865785121

Sum of electronic and zero-point Energies= -285.745217

Sum of electronic and thermal Energies= -285.738315

Sum of electronic and thermal Enthalpies= -285.737371

Sum of electronic and thermal Free Energies= -285.777745

**Doublet C6H5CH2**

C -1.001813 0.000016 -0.000005

C -0.255152 1.228610 0.000000

C 1.143261 1.222454 -0.000009

C 1.855150 -0.000028 0.000013

C 1.143212 -1.222483 0.000005

C -0.255184 -1.228574 -0.000031

H -0.797972 2.172104 -0.000006

H 1.688949 2.163494 -0.000008

H 2.942381 -0.000058 0.000034

H 1.688886 -2.163535 0.000043

H -0.798081 -2.172022 -0.000014

C -2.421485 -0.000011 -0.000010

H -2.986137 -0.929225 0.000108

H -2.985963 0.929333 0.000063

Energy = -270.875730944

*S*(*S*+1) before spin annihilation 0.7837, after 0.7508

Sum of electronic and zero-point Energies= -270.759929

Sum of electronic and thermal Energies= -270.754363

Sum of electronic and thermal Enthalpies= -270.753419

Sum of electronic and thermal Free Energies= -270.789574

**Singlet CH2CHCH2Cl**

C -1.256028 -0.869691 -1.698227

C -1.085574 -0.475920 -0.418267

C 0.176077 -0.695834 0.352381

H -0.461300 -1.357806 -2.259791

H -2.197638 -0.712741 -2.218507

H -1.894911 0.022958 0.113803

H 0.010050 -1.168238 1.322188

H 0.939432 -1.227377 -0.217002

Cl 0.976324 0.981876 0.814352

Energy = -132.231861048

Sum of electronic and zero-point Energies= -132.159876

Sum of electronic and thermal Energies= -132.155045

Sum of electronic and thermal Enthalpies= -132.154101

Sum of electronic and thermal Free Energies= -132.188003

**Doublet CH2CHCH2**

C -0.446421 -0.017024 -1.176787

C -0.387433 -0.022166 0.222702

C 0.790038 0.036766 0.979280

H 0.459188 0.035002 -1.778457

H -1.395532 -0.064973 -1.704325

H -1.332715 -0.076204 0.766317

H 0.766458 0.028686 2.065900

H 1.765486 0.092026 0.499400

Energy = -117.246105

*S*(*S*+1) before spin annihilation 0.7815, after 0.7502

Sum of electronic and zero-point Energies= -117.179473

Sum of electronic and thermal Energies= -117.175689

Sum of electronic and thermal Enthalpies= -117.174744

Sum of electronic and thermal Free Energies= -117.204631

**Energies of calculated complexes (Hartrees)**

*E*  *H G*

Quartet CpCr[(HN)2CH]Cl -444.242980 -444.097673 -444.149500

Quartet CpCr[(HN)2CH](CH2C6H5) -700.150738 -699.883705 -699.948239

Quintet CpCr[(HN)2CH] -429.247647 -429.107002-429.151473

Quartet CpCr[(HN)2CH](1-CH2CHCH2) -546.518624 -546.302235 -546.358527

Doublet CpCr[(HN)2CH](3-CH2CHCH2) -546.485332 -546.268456 -546.320183

Quartet CpCr[(H3SiN)2CH]Cl -454.424244 -454.244071 -454.306861

Quintet CpCr[(H3SiN)2CH] -439.426653 -439.250401 -439.310999

Singlet C6H5CH2Cl -285.865785 -285.737371 -285.777745

Doublet C6H5CH2  -270.875731 -270.753419 -270.789574

Singlet CH2CHCH2Cl -132.231861 -132.154101 -132.188003

Doublet CH2CHCH2  -117.246105 -117.174744 -117.204631

**Energetics of R–Cl bond activation (kcal/mol) at 298.15 K and 1 atm**

CpCr[(HN)2CH] + PhCH2Cl  CpCr[(HN)2CH]Cl + PhCH2

*S* = 2 *S* = 0 *S* = 3/2 *S* = 1/2

E = -3.3 H = -4.2 G = -6.2

CpCr[(HN)2CH] + CH2CHCH2Cl  CpCr[(HN)2CH]Cl + CH2CHCH2

*S* = 2 *S* = 0 *S* = 3/2 *S* = 1/2

E = -6.0 H = -7.1 G = -9.2

CpCr[(H3SiN)2CH] + PhCH2Cl  CpCr[(H3SiN)2CH]Cl + PhCH2

*S* = 2 *S* = 0 *S* = 3/2 *S* = 1/2

E = -4.7 H = -6.1 G = -4.8

CpCr[(H3SiN)2CH] + CH2CHCH2Cl  CpCr[(H3SiN)2CH]Cl + CH2CHCH2

*S* = 2 *S* = 0 *S* = 3/2 *S* = 1/2

E = -7.4 H = -9.0 G = -7.8

CpCr[(HN)2CH] + PhCH2  CpCr[(HN)2CH](CH2Ph)

*S* = 2 *S* = 1/2 *S* = 3/2

E = -17.2 H = -14.6 G = -4.5

CpCr[(HN)2CH] + CH2CHCH2  CpCr[(HN)2CH](1-CH2CHCH2)

*S* = 2 *S* = 1/2 *S* = 3/2

E = -15.6 H = -12.9 G = -1.5

**Comparison of DFT and X-Ray bond lengths (Å) and angles (º)**

CpCr[(Me3SiN)2CPh] **3a** CpCr[(HN)2CH] CpCr[(H3SiN)2CH]

Cr(1)–N(1) 2.039(2) 2.062 2.073

Cr(1)–N(2) 2.054(2) 2.062 2.074

Cr(1)–C(14-18) (ave) 2.320 2.412 2.410

N(1)–C(1) 1.332(4) 1.346 1.345

N(2)–C(1) 1.332(4) 1.345 1.345

N(1)–Si(1) 1.726(3) -- 1.760

N(2)–Si(2) 1.738(2) -- 1.760

N(1)–Cr(1)–N(2) 66.53(9) 65.564 66.287

N(1)–C(1)–N(2) 114.9(2) 112.127 114.888

Cr(1)–N(1)–Si(1) 133.1(2) 148.423 141.187

Cr(1)–N(2)–Si(2) 138.1(1) 148.418 141.196

CpCr[(Me3SiN)2CPh]Cl **1a** CpCr[(HN)2CH]Cl CpCr[(H3SiN)2CH]Cl

Cr(1)–N(1) 2.028(1) 2.026 2.032

Cr(1)–N(2) 2.029(1) 2.026 2.032

Cr(1)–C(14-18) (ave) 2.247 2.341 2.345

N(1)–C(1) 1.330(2) 1.342 1.342

N(2)–C(1) 1.329(2) 1.342 1.342

N(1)–Si(1) 1.751(1) -- 1.764

N(2)–Si(2) 1.751(1) -- 1.764

Cr(1)–Cl(1) 2.2915(5) 2.3222 2.3178

N(1)–Cr(1)–N(2) 66.78(5) 65.986 66.985

N(1)–C(1)–N(2) 114.3(1) 110.591 113.359

Cr(1)–N(1)–Si(1) 137.23(7) 143.475 138.574

Cr(1)–N(2)–Si(2) 136.49(8) 143.484 138.580

N(1)–Cr(1)–Cl(1) 95.64(4) 97.470 97.414

N(2)–Cr(1)–Cl(1) 95.78(4) 97.488 97.323

**Comparison of DFT and X-Ray bond lengths (Å) and angles (º) (cont.)**

CpCr[(Me3SiN)2CPh](CH2Ph) **2a** CpCr[(HN)2CH](CH2Ph)

Cr(1)–N(1) 2.040(2) 2.036

Cr(1)–N(2) 2.031(2) 2.036

Cr(1)–C(14-18) (ave) 2.261 2.386

N(1)–C(1) 1.329(2) 1.343

N(2)–C(1) 1.332(2) 1.343

Cr(1)–C(19) 2.105(2) 2.109

C(19)–C(20) 1.482(3) 1.489

N(1)–Cr(1)–N(2) 66.58(6) 65.970

N(1)–C(1)–N(2) 114.2(2) 111.229

Cr(1)–N(1)–Si(1) 138.08(9) 146.344

Cr(1)–N(2)–Si(2) 137.49(9) 146.443

N(1)–Cr(1)–C(19) 91.21(8) 98.089

N(2)–Cr(1)–C(19) 98.75(8) 98.065

Cr(1)–C(19)–C(20) 116.8(1) 117.105

1. **References**

   ? A. B. Pangborn, M. A. Giardello, R. H. Grubbs, R. K. Rosen and F. J. Timmers, *Organometallics*, 1996, **15**, 1518-1520. [↑](#endnote-ref-2)
2. A. Furstner and N. Shi, *J. Am. Chem. Soc.,* 1996, **118**, 12349-12357. [↑](#endnote-ref-3)
3. M. Wedler, F. Knösel, M. Noltemeyer, F. T. Edelmann and U. Behrens, *J. Organomet. Chem*., 1990, **388**, 21-45; D. G. Dick, R. Duchateau, J. J. H. Edema and S. Gambarotta, *Inorg. Chem*. 1993, **32**, 1959-1962. [↑](#endnote-ref-4)
4. Gaussian 98, Revision A.9, M. J. Frisch, G. W. Trucks, H. B. Schlegel, G. E. Scuseria, M. A. Robb, J. R. Cheeseman, V. G. Zakrzewski, J. A. Montgomery, Jr., R. E. Stratmann, J. C. Burant, S. Dapprich, J. M. Millam, A. D. Daniels, K. N. Kudin, M. C. Strain, O. Farkas, J. Tomasi, V. Barone, M. Cossi, R. Cammi, B. Mennucci, C. Pomelli, C. Adamo, S. Clifford, J. Ochterski, G. A. Petersson, P. Y. Ayala, Q. Cui, J. B. Foresman, J. Cioslowski, J. V. Oritz, A. G. Baboul, B. B. Stefanov, G. Liu, A. Liashenko, P. Piskorz, I Komaromi, R. Gomperts, R. L. Martin, D. J. Fox, T. Keith, M. A. Al-Laham, C. Y. Peng, A. Nanayakkara, M. Challacombe, P. M. W. Gill, B. Johnson, W. Chen, M. W. Wong, J. L. Andres, C. Gonzalez, M. Head-Gordon, E. S. Replogle and J. A. Pople, Gaussian, Inc., Pittsburgh PA, 1998. [↑](#endnote-ref-5)
5. A. D. Becke, *J. Chem. Phys.* 1993, **98**, 5648-5652. [↑](#endnote-ref-6)
6. T. H. Dunning, Jr. and P. J. Hay in *Modern Theoretical Chemistry*; H. F. Schaefer III, Ed.; Plenum Press: New York, 1976; pp 1-28; P. J. Hay and W. R. Wadt, *J. Chem. Phys*. 1985, **82**, 270-283; W. R. Wadt and P. J. Hay, *J. Chem. Phys*. 1985, **82**, 284-298; P. J. Hay and W. R. Wadt, *J. Chem. Phys*. 1985, **82**, 299-310. [↑](#endnote-ref-7)
